# Supplementary material
Source: PubMed Central journal article supplement (PMC9588728)

Supplemental Data

Table 1S: Bronchoalveolar Lavage Metabolites that were significant with a 10% false-discovery rate multiplicity adjustment in paired t-tests.

| <b>Metabolite</b> | <b>T-Test Statistic</b> | <b>Q-Value</b> | <b>P-Value</b> |
|-------------------|-------------------------|----------------|----------------|
| PC(31:0)          | -4.027                  | 0.0676         | 0.0005         |
| PC(31:3)          | -3.807                  | 0.0683         | 0.0008         |
| PC(34:4)          | -3.969                  | 0.0676         | 0.0005         |

PC = phosphatidylcholine (number of carbons:number of double bonds)

Figure 1S: Observed percent predicted FEV1 vs. predicted value from lasso regression. The correlation between observed and predicted values was approximately 0.39.

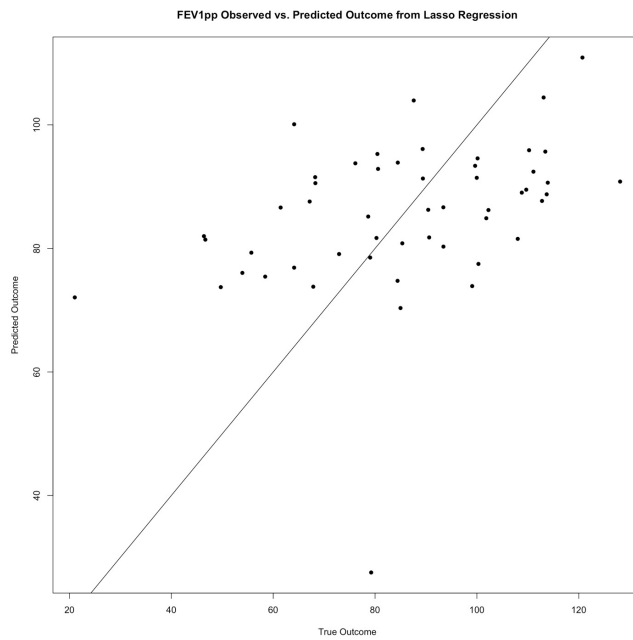

Figure 2S: Distribution of p-values resulting from Pearson correlation tests for significant correlations between metabolites in lavage and plasma. The distribution of p-values appears to be relatively uniform, reflecting little correlation between metabolites in lavage and plasma.

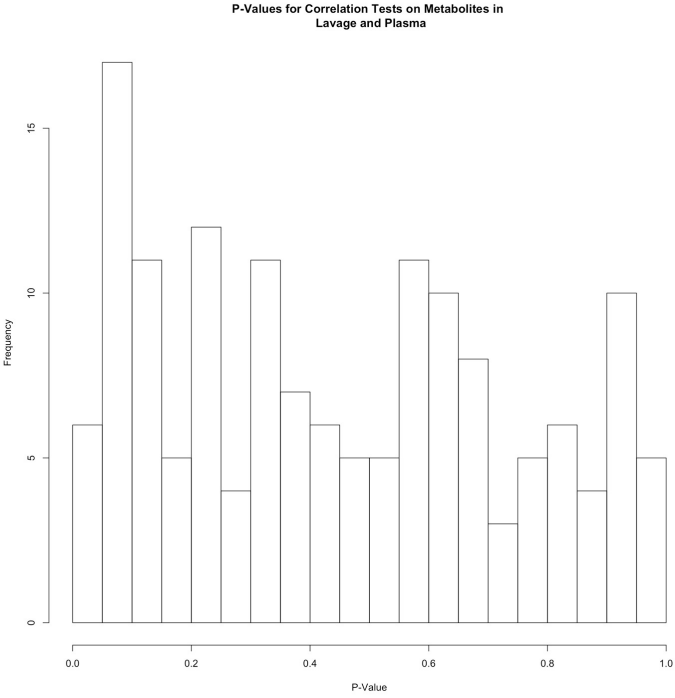

Supplement: NIHMS1823320-supplement-Supplemental_Digital_Content.pdf [file NIHMS1823320-supplement-Supplemental_Digital_Content.pdf]
